# Supplementary figures and images for: Co-Targeting MAP Kinase and Pi3K-Akt-mTOR Pathways in Meningioma: Preclinical Study of Alpelisib and Trametinib
Source: MDPI journal article supplement (doi:10.3390/cancers14184448), 2022-09-13

Figure 1

BEN-MEN-1

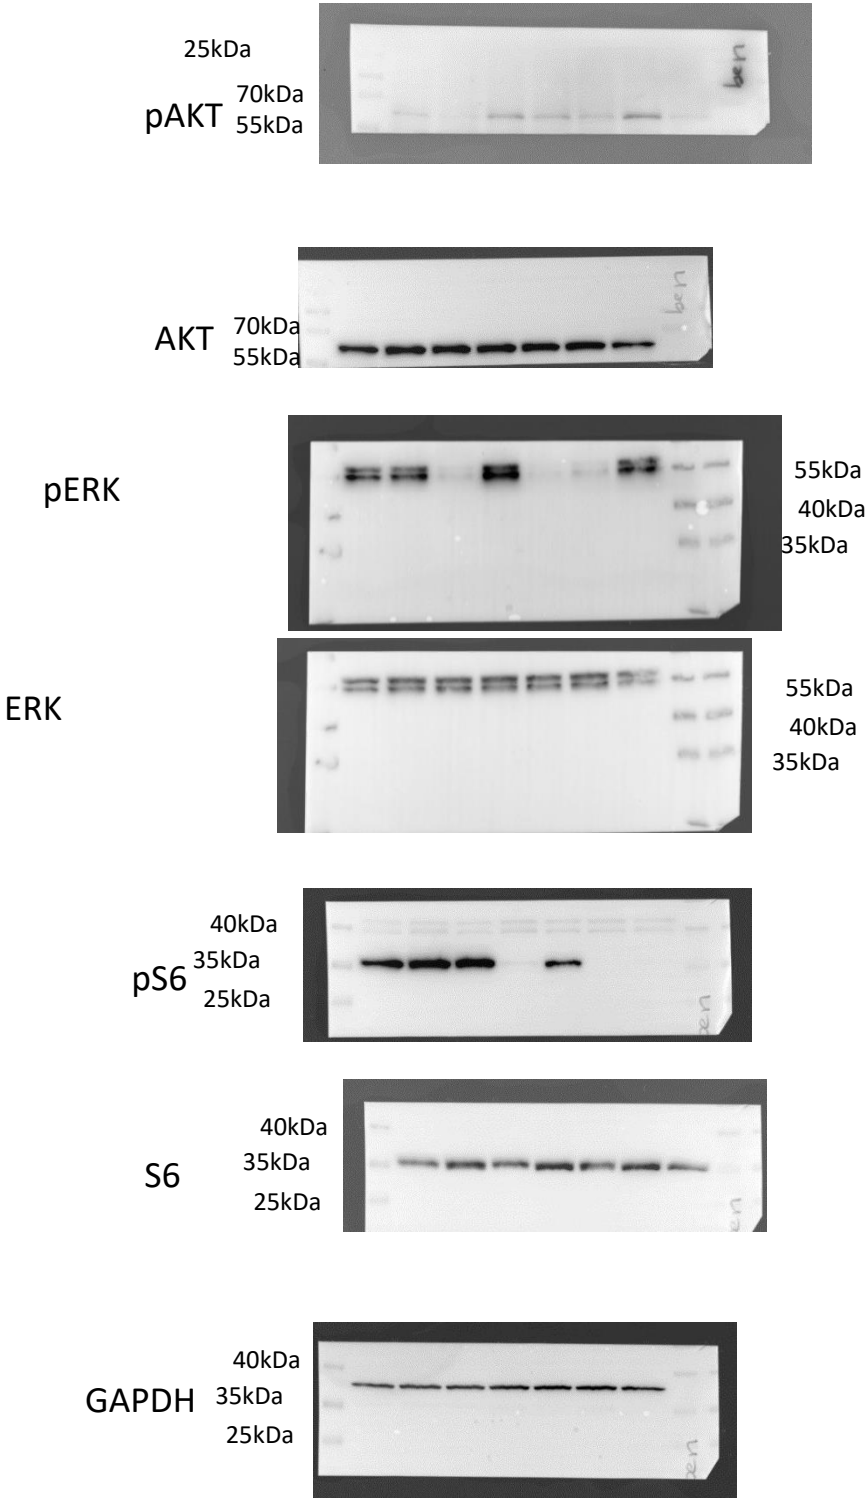

# CH-157MN

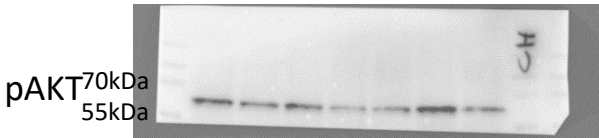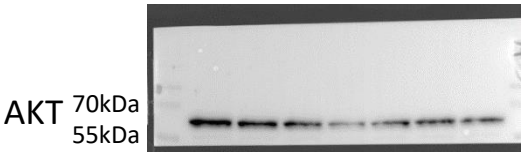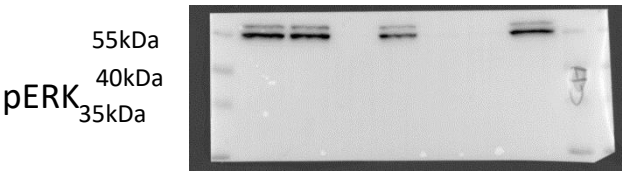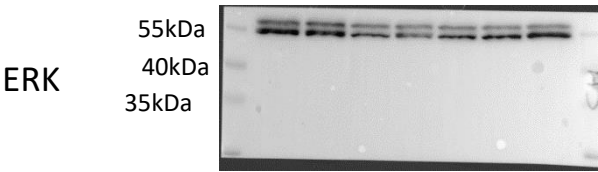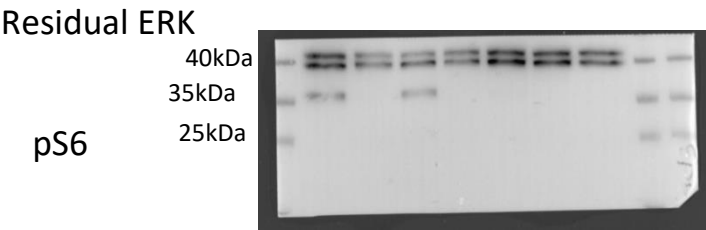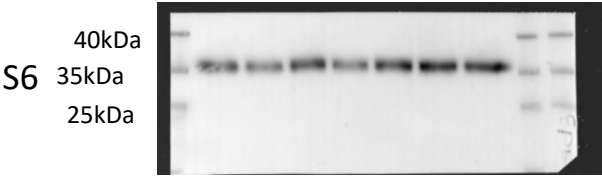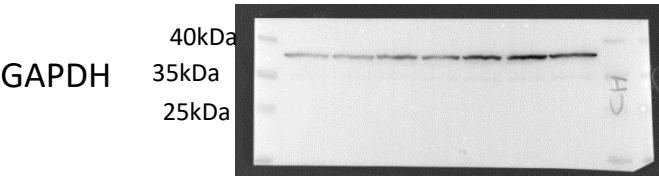

IOMM-Lee

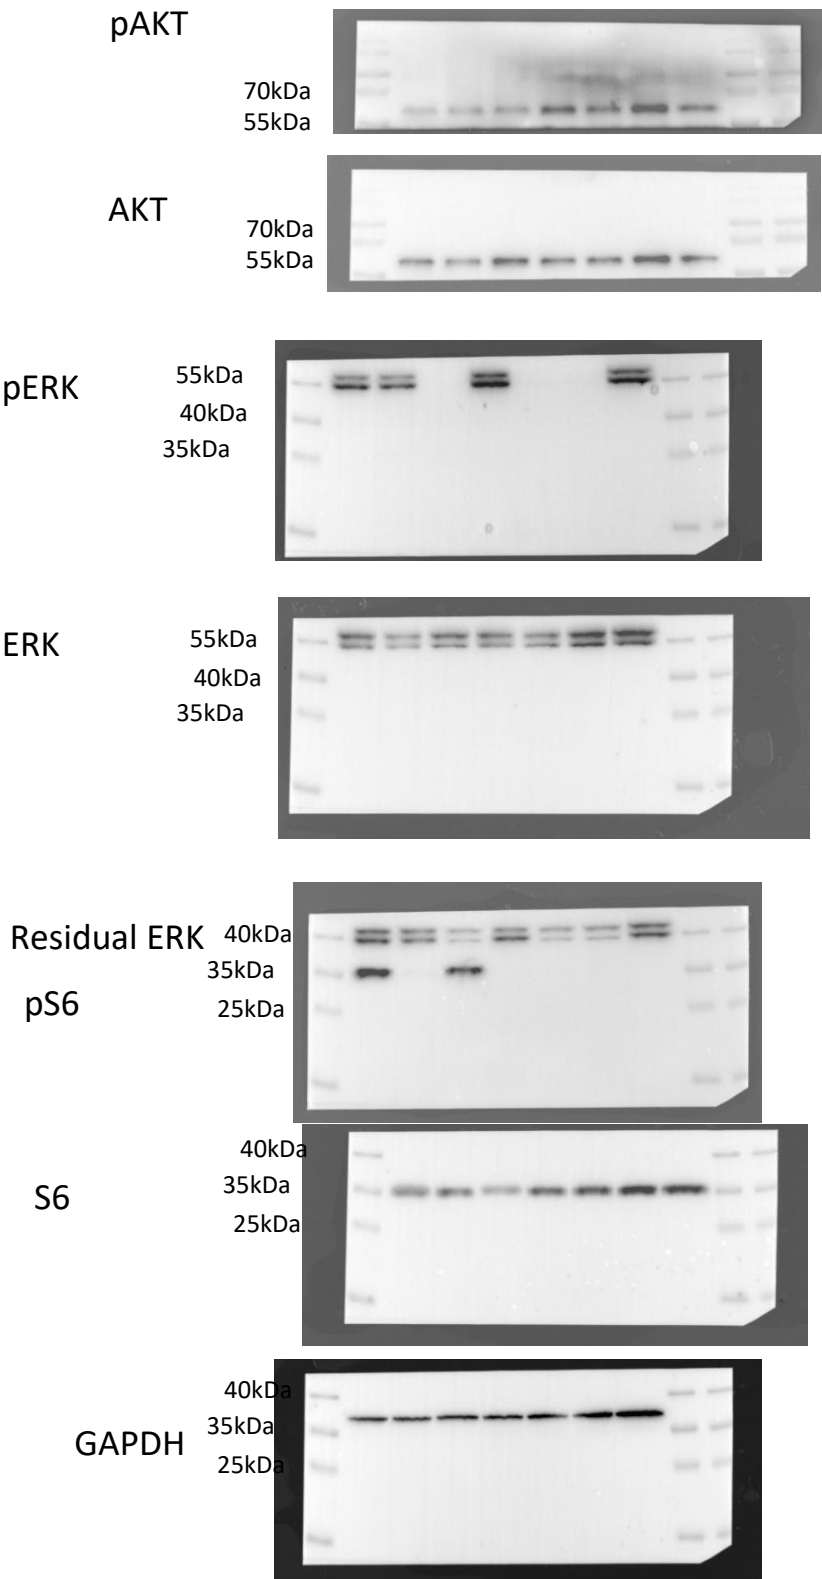

Figure 4

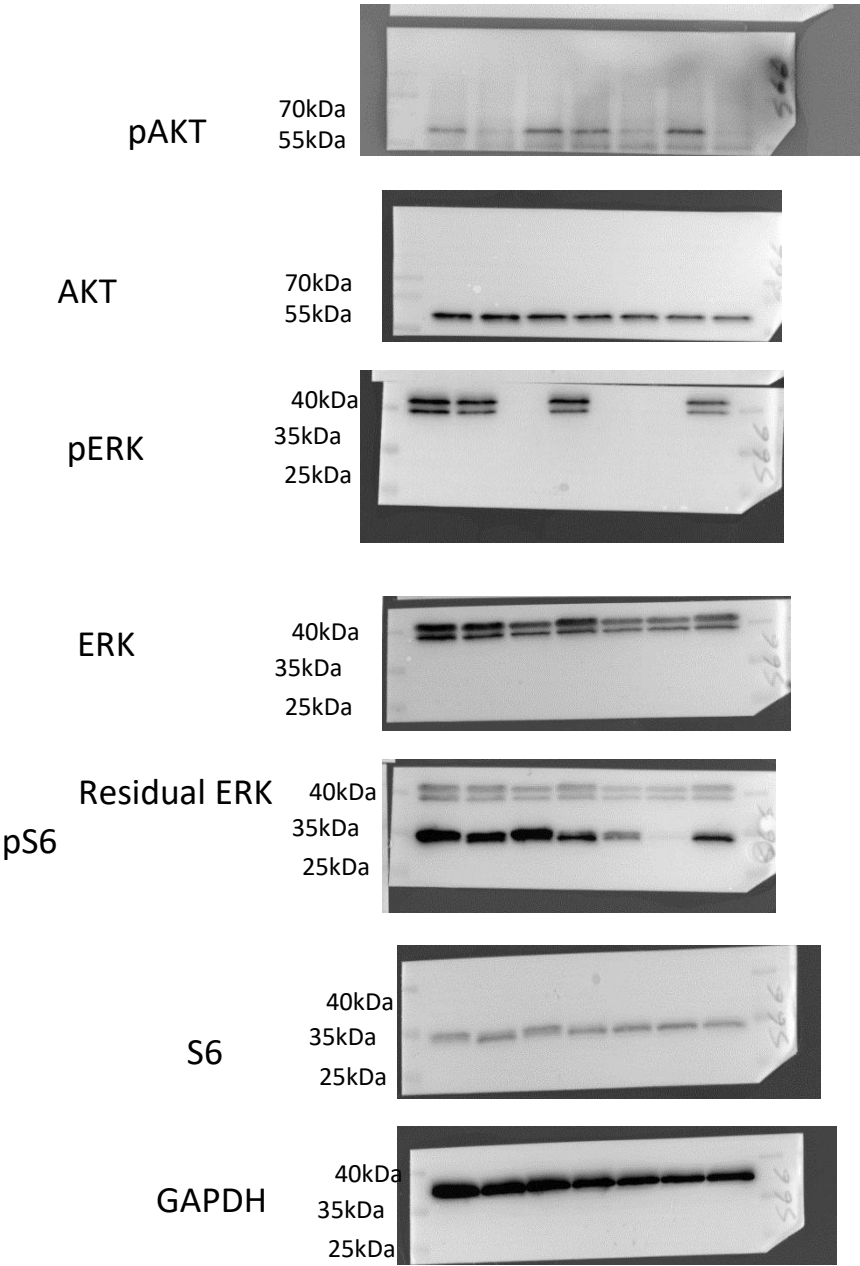

Figure 6

B

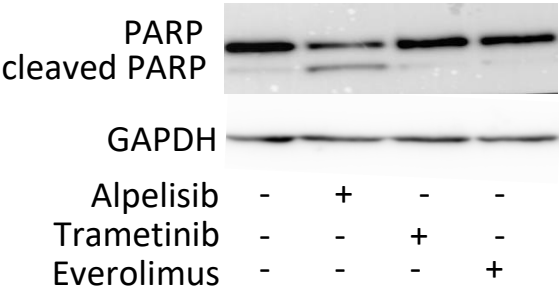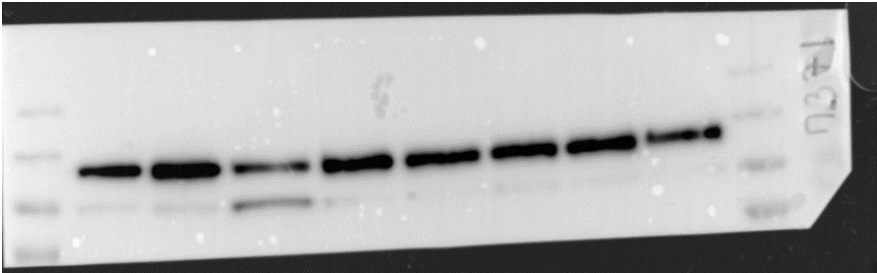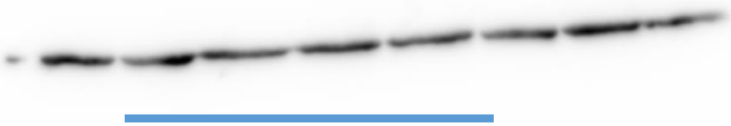

2, 3, 4 and 5 for the paper

Supplement: s1 [file s1]
